# Supplementary material for: Interaction of Temporin-L Analogues with the E. coli FtsZ Protein
Source: MDPI journal article supplement (doi:10.3390/antibiotics10060704), 2021-06-11
Supplement: s1 [file s1]

## Supplementary Materials

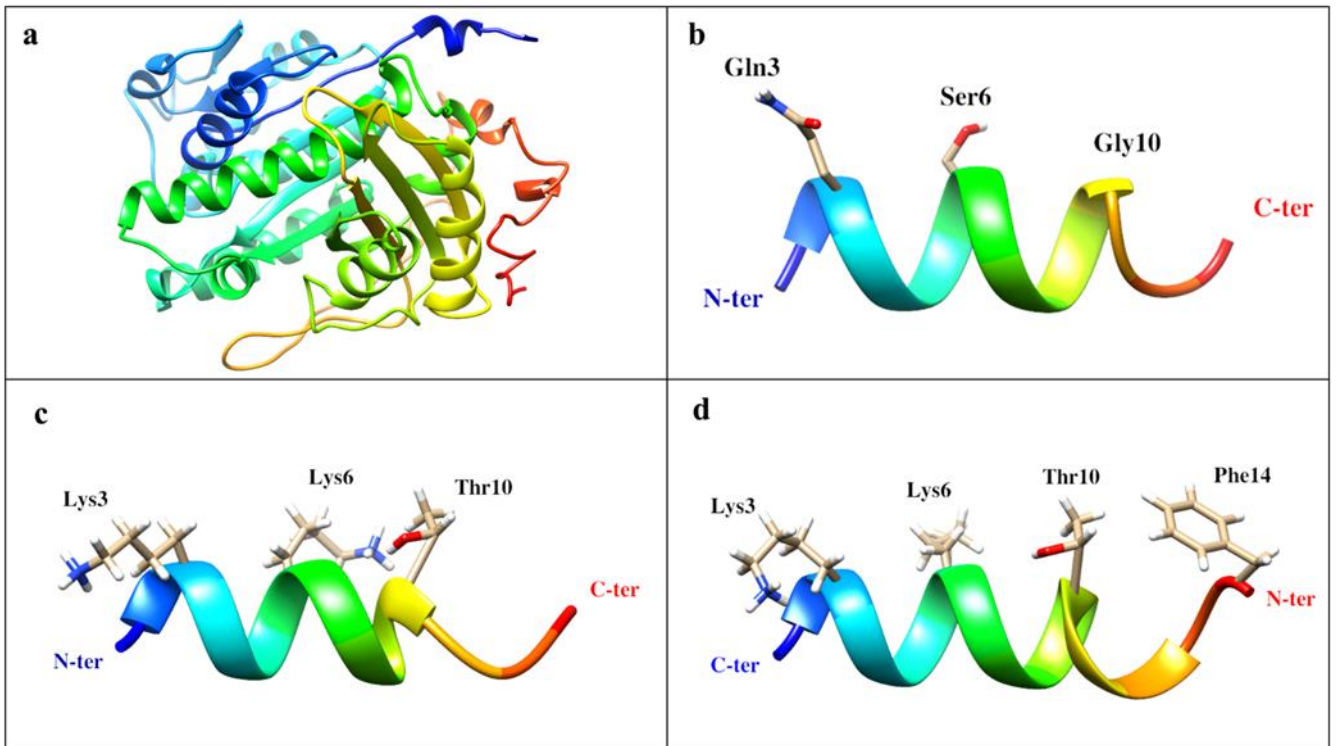

**Figure S1.** 3D model of FtsZ (a), native Temporin-L (b) TRIL analogue (c) and TRILF analogue (d) obtained by *ab initio* modelling with I-TASSER server.

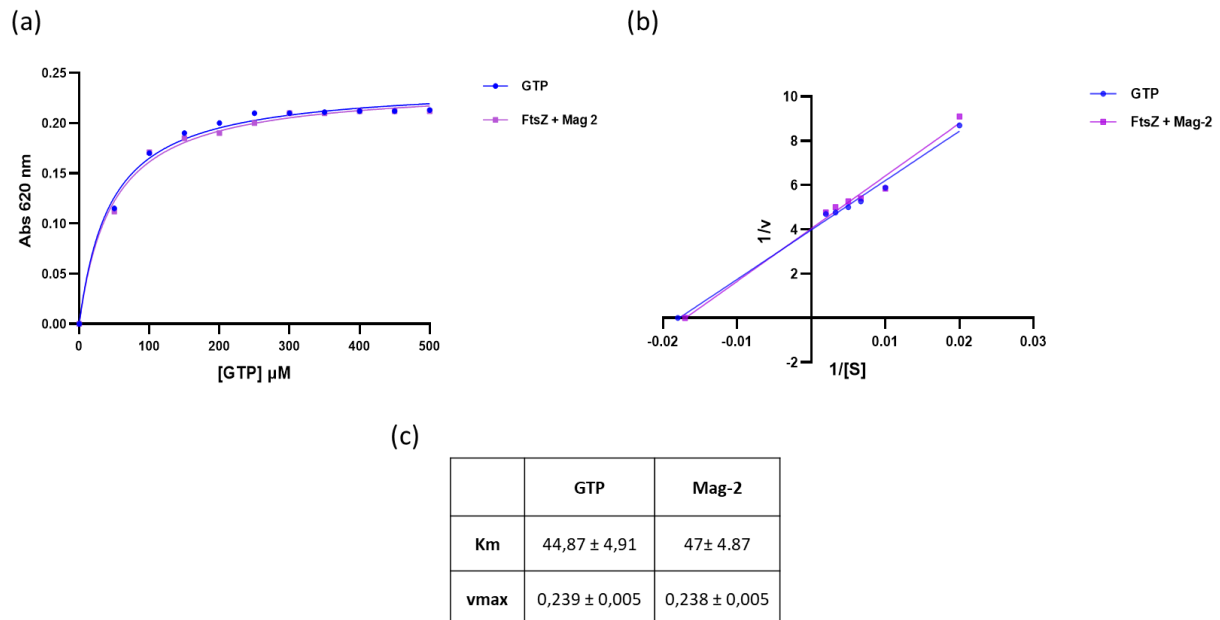

**Figure S2.** a) Enzymatic activity of recombinant FtsZ (12  $\mu\text{M}$ ) was performed in 25 mM PIPES/NaOH (pH 6.8), 20mM  $\text{MgCl}_2$ , in the absence (blue line) and in the presence of 35 $\mu\text{M}$  of Mag-2 peptide (magenta line), using GTP as substrate. The reaction was performed for 10 min and the  $\text{P}_i$  release was determined by measuring the absorbance at 620 nm following 25 min incubation. b) Lineweaver Burk plots from which the  $K_m$  constants were calculated. c) Calculated  $K_m$  constants and  $V_{max}$  for the enzymatic assays. The experiment was performed in duplicate and presented as mean  $\pm$  standard error.
